# Supplementary material for: Intra-Rater and Inter-Rater Reliability of Pressure Pain Algometry of the Sural and Tibial Nerves in Asymptomatic Elite Youth Footballers
Source: MDPI journal article supplement (doi:10.3390/sports9090132), 2021-09-18
Supplement: s1 [file s1]

Figure S1: Bland-Altman plots for Intra-rater and Inter-rater reliability of Tibial and Sural nervous tissue for elite youth football players.

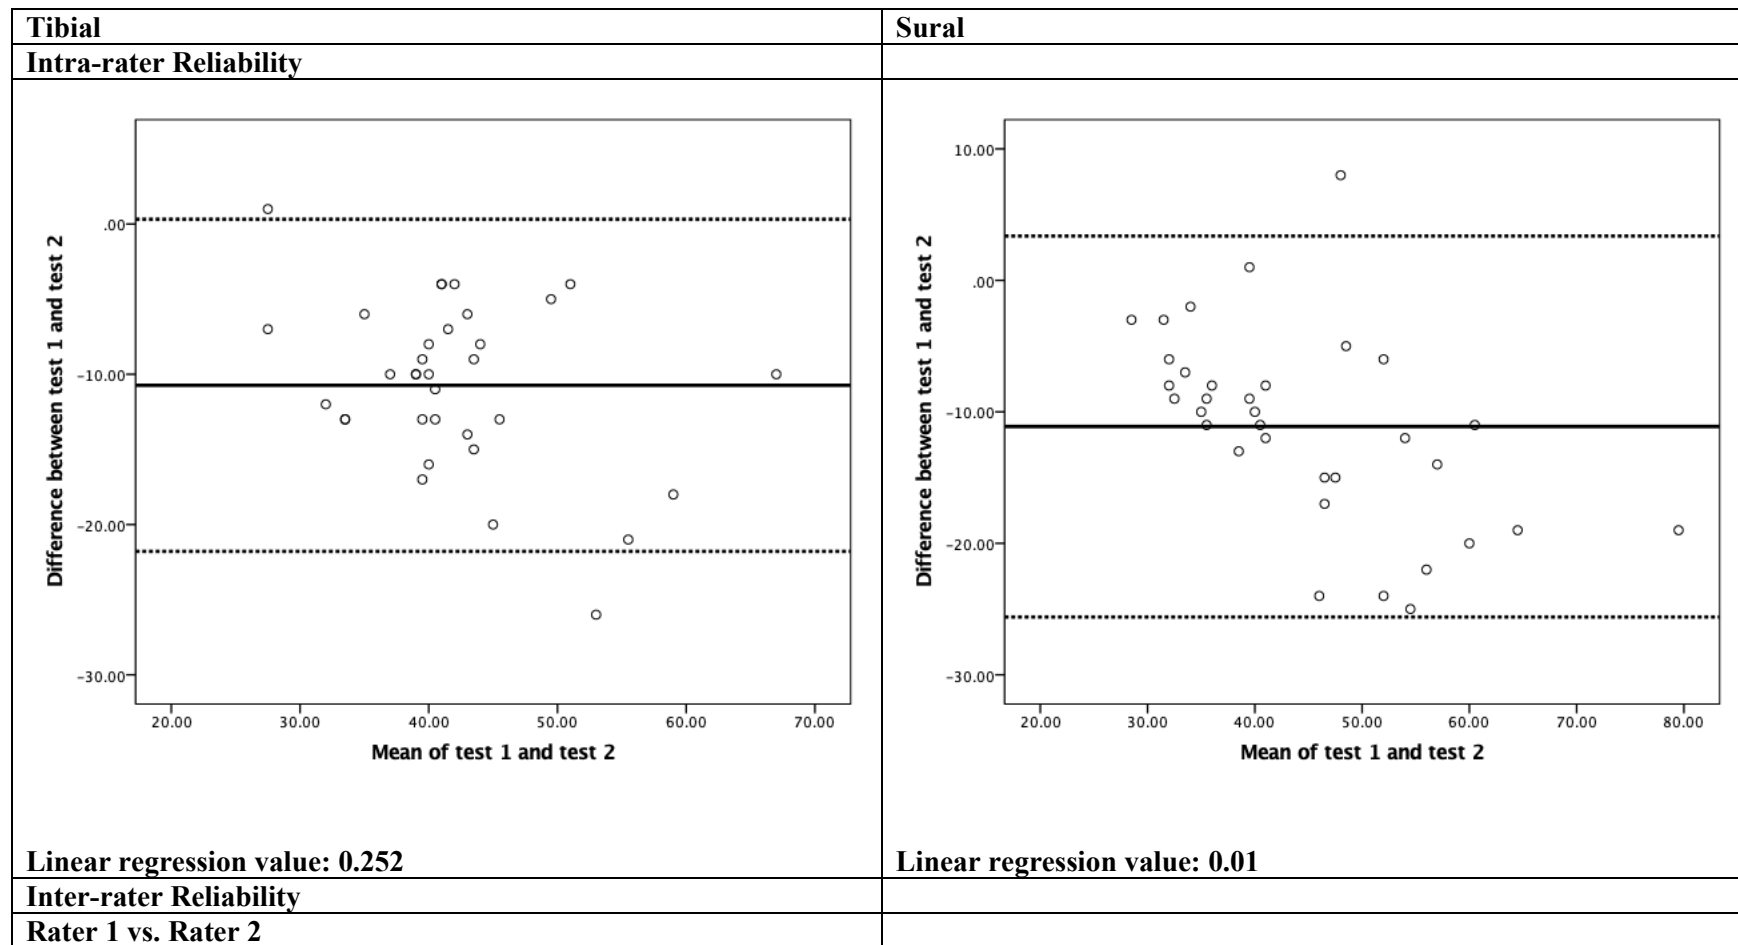

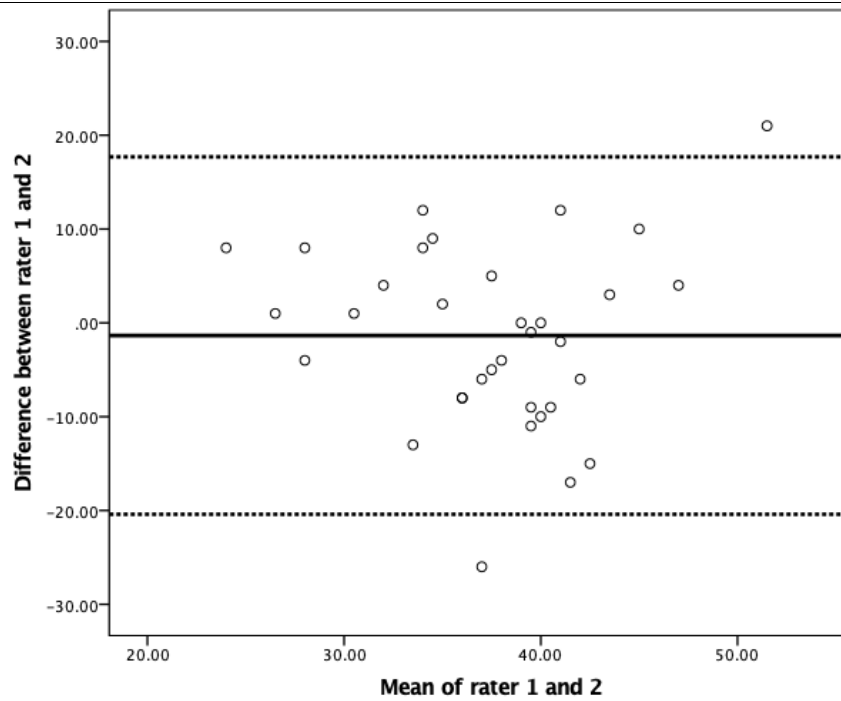

Linear Regression Value: 0.951

Rater 1 vs. Rater 3

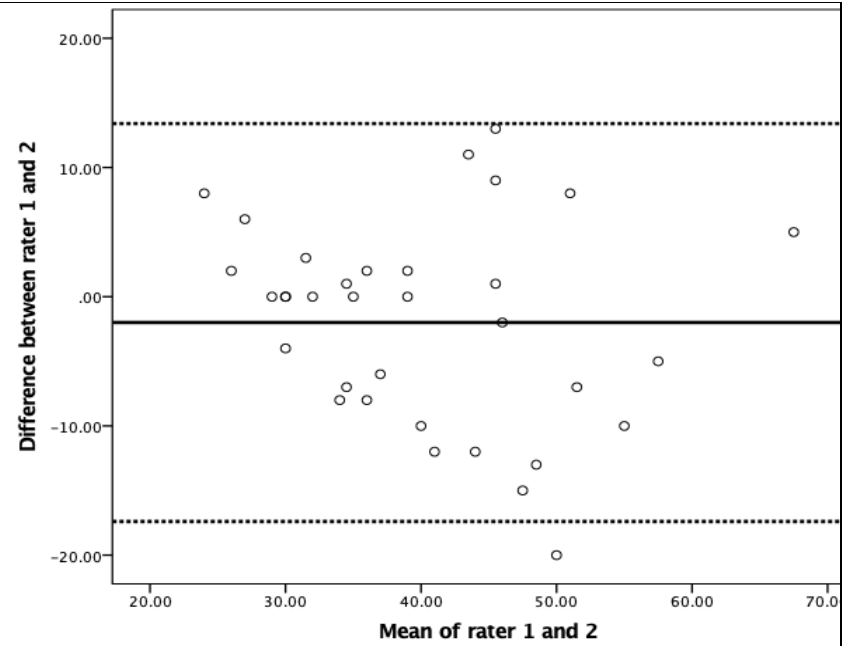

Linear Regression Value: 0.261

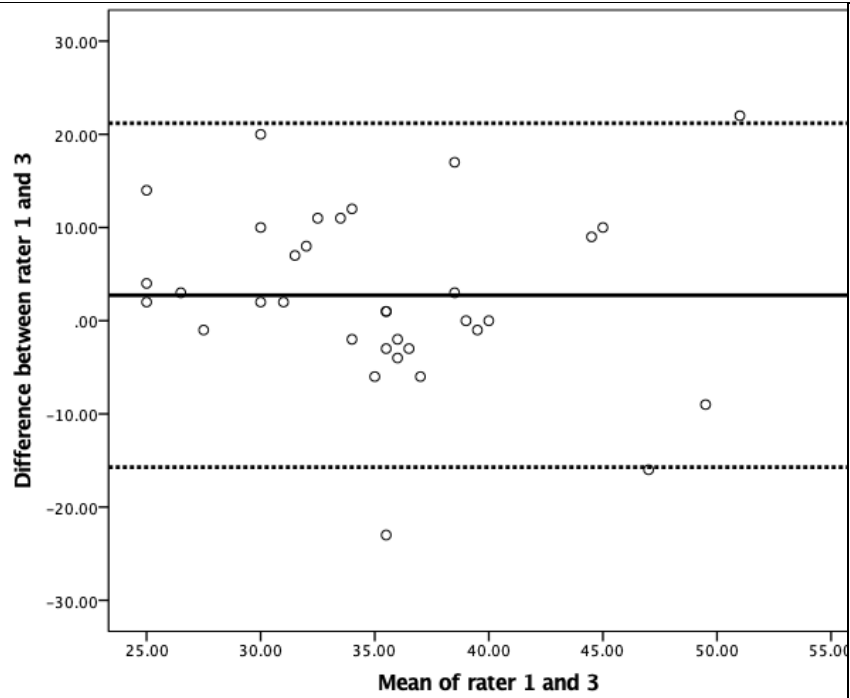

**Linear Regression Value: 0.600**

**Rater 2 vs. Rater 3**

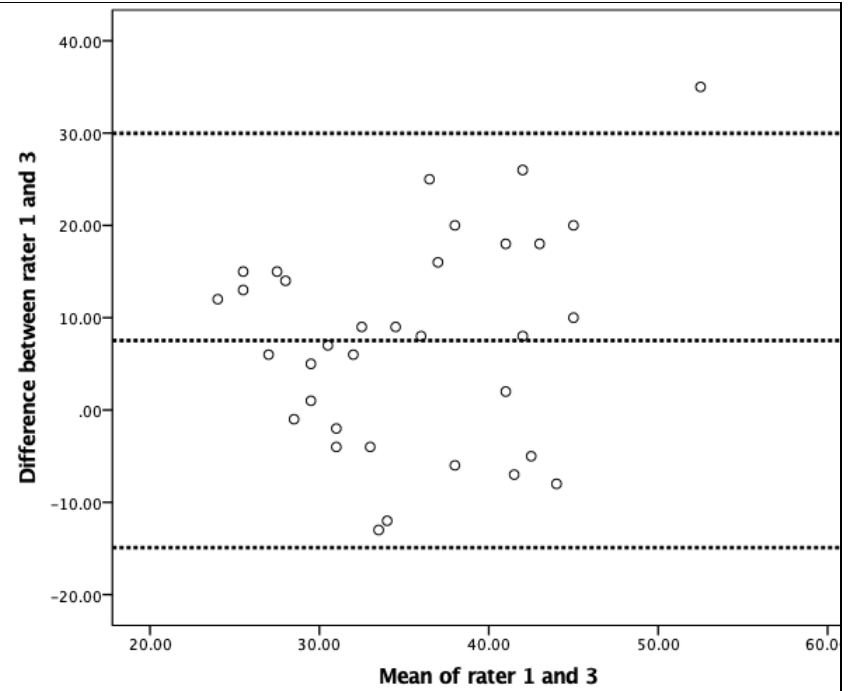

**Linear Regression Value: 0.199**

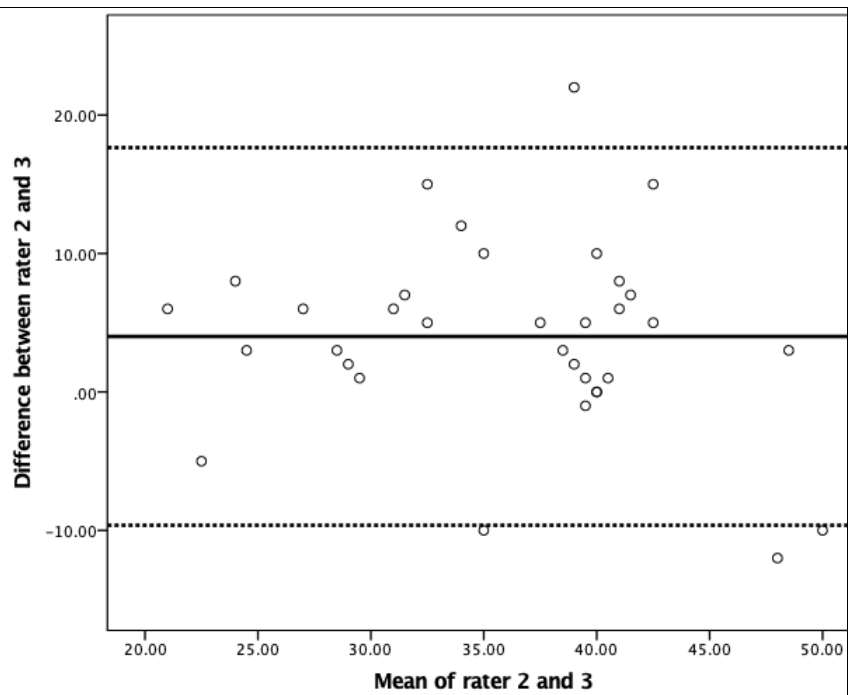

Linear Regression Value: 0.457

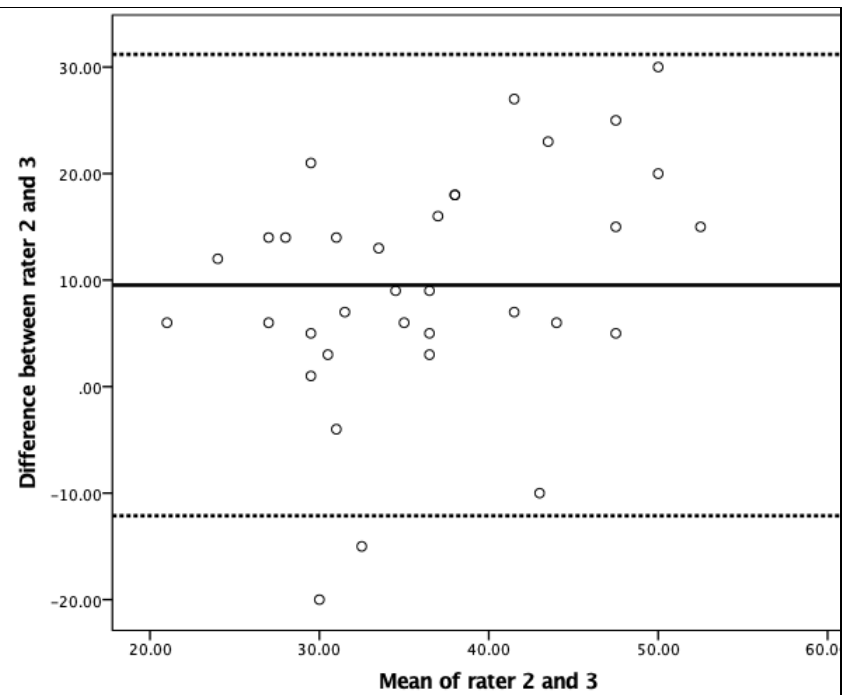

Linear Regression Value: 0.06
